# Supplementary material for: Ferrocene carboxylic acid-doped copper MOFs as a nanozyme with high peroxidase-mimicking activity for catalytic dye degradation
Source: Royal Society of Chemistry journal article supplement (doi:10.1039/d3nj05327j), 2023-12-26
Supplement: d3nj05327j1.pdf [file d3nj05327j1.pdf]

## Supporting Information

### Ferrocene carboxylic acid-doped copper MOFs as a nanozyme with high peroxidase-mimicking activity for catalytic dye degradation

Hui Xie, Rongqiu Yan, Yu Zhang and Chenghong Lei\*

*Guilin University of Technology, College of Chemistry and Bioengineering, Guilin, Guangxi 541006, China*

\*Corresponding authors

Email: [clei@glut.edu.cn](mailto:clei@glut.edu.cn)

**Table S1.** Comparison of kinetic parameters of Fc-Cu PTA as a peroxidase-mimicking nanozyme with reported nanomaterials.

| Substrate                                      | H <sub>2</sub> O <sub>2</sub> |                                                           | TMB                 |                                                           | References |
|------------------------------------------------|-------------------------------|-----------------------------------------------------------|---------------------|-----------------------------------------------------------|------------|
|                                                | K <sub>m</sub> (mM)           | V <sub>max</sub><br>(10 <sup>-8</sup> M s <sup>-1</sup> ) | K <sub>m</sub> (mM) | V <sub>max</sub><br>(10 <sup>-8</sup> M s <sup>-1</sup> ) |            |
| Fc-Cu PTA                                      | 0.33                          | 16.7                                                      | 0.046               | 5                                                         | This work  |
| HRP                                            | 3.70                          | 8.71                                                      | 0.434               | 10                                                        | 1          |
| Fe <sub>3</sub> O <sub>4</sub> MNPs            | 154                           | 9.78                                                      | 0.098               | 3.44                                                      | 1          |
| Au MS                                          | 78.6                          | 9.9                                                       | 0.146               | 5.07                                                      | 2          |
| Cu-MOF                                         | 28.58                         | 5.45                                                      | 0.456               | 2.478                                                     | 3          |
| MOF(Co/2Fe)                                    | 4.22                          | 4.9                                                       | 0.25                | 3.8                                                       | 4          |
| NiFe <sub>2</sub> O <sub>4</sub>               | 2.6                           | 14.11                                                     | 0.55                | 4.57                                                      | 5          |
| Au-NPFe <sub>2</sub> O <sub>3</sub> NC         | 138.5                         | 4.770                                                     | 0.0429              | 5.882                                                     | 6,7        |
| IO-MC                                          | 14.9                          | 1.93                                                      | 0.242               | 1.64                                                      | 8          |
| Mesoporous<br>γ-Fe <sub>2</sub> O <sub>3</sub> | 144.3                         | 1.84                                                      | 0.0997              | 52                                                        | 9          |
| Mesoporous<br>α-Fe <sub>2</sub> O <sub>3</sub> | 127.92                        | 3.77                                                      | 0.5304              | 5.43                                                      | 9          |
| IONF_250                                       | 150.47                        | 3.12                                                      | 0.24                | 3.07                                                      | 10         |
| Mesoporous<br>Fe <sub>2</sub> O <sub>3</sub>   | 146.7                         | 6.37                                                      | 0.298               | 7.36                                                      | 11         |

## References

1. L. Gao, J. Zhuang, L. Nie, J. Zhang, Y. Zhang, N. Gu, T. Wang, J. Feng, D. Yang, S. Perrett and X. Yan, *Nat Nanotechnol*, 2007, **2**, 577-583.
2. S. Ray, R. Biswas, R. Banerjee and P. Biswas, *Nanoscale Advances*, 2020, **2**, 734-745.
3. H. Yu, H. Wu, X. Tian, Y. Zhou, C. Ren and Z. Wang, *RSC Advances*, 2021, **11**, 26963-26973.
4. H. Yang, R. Yang, P. Zhang, Y. Qin, T. Chen and F. Ye, *Microchimica Acta*, 2017, **184**, 4629-4635.
5. L. Su, W. Qin, H. Zhang, Z. U. Rahman, C. Ren, S. Ma and X. Chen, *Biosensors and Bioelectronics*, 2015, **63**, 384-391.
6. M. K. Masud, S. Yadav, M. N. Islam, N.-T. Nguyen, C. Salomon, R. Kline, H. R. Alamri, Z. A. Allothman, Y. Yamauchi, M. S. A. Hossain and M. J. A. Shiddiky, *Analytical Chemistry*, 2017, **89**, 11005-11013.
7. K. Boriachek, M. K. Masud, C. Palma, H.-P. Phan, Y. Yamauchi, M. S. A. Hossain, N.-T. Nguyen, C. Salomon and M. J. A. Shiddiky, *Analytical Chemistry*, 2019, **91**, 3827-3834.
8. M. A. Wahab, S. M. A. Hossain, M. K. Masud, H. Park, A. Ashok, M. Mustapić, M. Kim, D. Patel, M. Shahbazi, M. S. A. Hossain, Y. Yamauchi and Y. V. Kaneti, *Sensors and Actuators B: Chemical*, 2022, **366**, 131980.
9. M. K. Masud, J. Kim, M. M. Billah, K. Wood, M. J. A. Shiddiky, N.-T. Nguyen, R. K. Parsapur, Y. V. Kaneti, A. A. Alshehri, Y. G. Alghamidi, K. A. Alzahrani, M. Adharvanachari, P. Selvam, M. S. A. Hossain and Y. Yamauchi, *Journal of Materials Chemistry B*, 2019, **7**, 5412-5422.
10. S. Tanaka, M. K. Masud, Y. V. Kaneti, M. J. A. Shiddiky, A. Fatehmulla, A. M. Aldhafiri, W. A. Farooq, Y. Bando, M. S. A. Hossain and Y. Yamauchi, *ChemNanoMat*, 2019, **5**, 506-513.
11. R. Bhattacharjee, S. Tanaka, S. Moriam, M. K. Masud, J. Lin, S. M. Alshehri, T. Ahamad, R. R. Salunkhe, N.-T. Nguyen, Y. Yamauchi, M. S. A. Hossain and M. J. A. Shiddiky, *Journal of Materials Chemistry B*, 2018, **6**, 4783-4791.
